# Supplementary material
Source: Springer Nature journal article supplement (https://www.springermedizin.de/resource/supplementary/12903_2013_372_MOESM1_ESM.pdf/9516876)
Supplement: MOESM1 [file 9516876]

# National health registers



| <b>Norway</b>                                                                                                                                                                                                  | <b>Sweden</b>                                                                                                                                                                                                                                                          | <b>Denmark</b>                                                                                                                                                                                                                 |
|----------------------------------------------------------------------------------------------------------------------------------------------------------------------------------------------------------------|------------------------------------------------------------------------------------------------------------------------------------------------------------------------------------------------------------------------------------------------------------------------|--------------------------------------------------------------------------------------------------------------------------------------------------------------------------------------------------------------------------------|
| <p data-bbox="62 616 487 771">Municipality-State-Report<br/>(KOSTRA)</p> <p data-bbox="87 870 462 911"><a href="http://www.ssb.no">http://www.ssb.no</a></p> <p data-bbox="123 973 426 1015">Dental health</p> | <p data-bbox="602 616 1049 823">Swedish National Board of Health and Welfare<br/>(Socialstyrelsen)</p> <p data-bbox="569 870 1082 911"><a href="http://www.socialstyrelsen.se">http://www.socialstyrelsen.se</a></p> <p data-bbox="677 973 974 1015">Dental health</p> | <p data-bbox="1181 616 1577 766">National Board of Health<br/>(the Scor-system)</p> <p data-bbox="1189 870 1561 911"><a href="http://www.sst.dk">http://www.sst.dk</a></p> <p data-bbox="1222 973 1528 1015">Dental health</p> |
